# Supplementary material
Source: publisher figshare collection journal article supplement (https://frontiersin.figshare.com/ndownloader/files/23659097)
Supplement: Supplementary file [file 23659097]

## *Supplementary Material*

### **1 Supplementary Figures and Tables**

For more information on Supplementary Material and for details on the different file types accepted, please see [here](#). Figures, tables, and images will be published under a Creative Commons CC-BY licence and permission must be obtained for use of copyrighted material from other sources (including re-published/adapted/modified/partial figures and images from the internet). It is the responsibility of the authors to acquire the licenses, to follow any citation instructions requested by third-party rights holders, and cover any supplementary charges.

#### **1.1 Supplementary Figures**

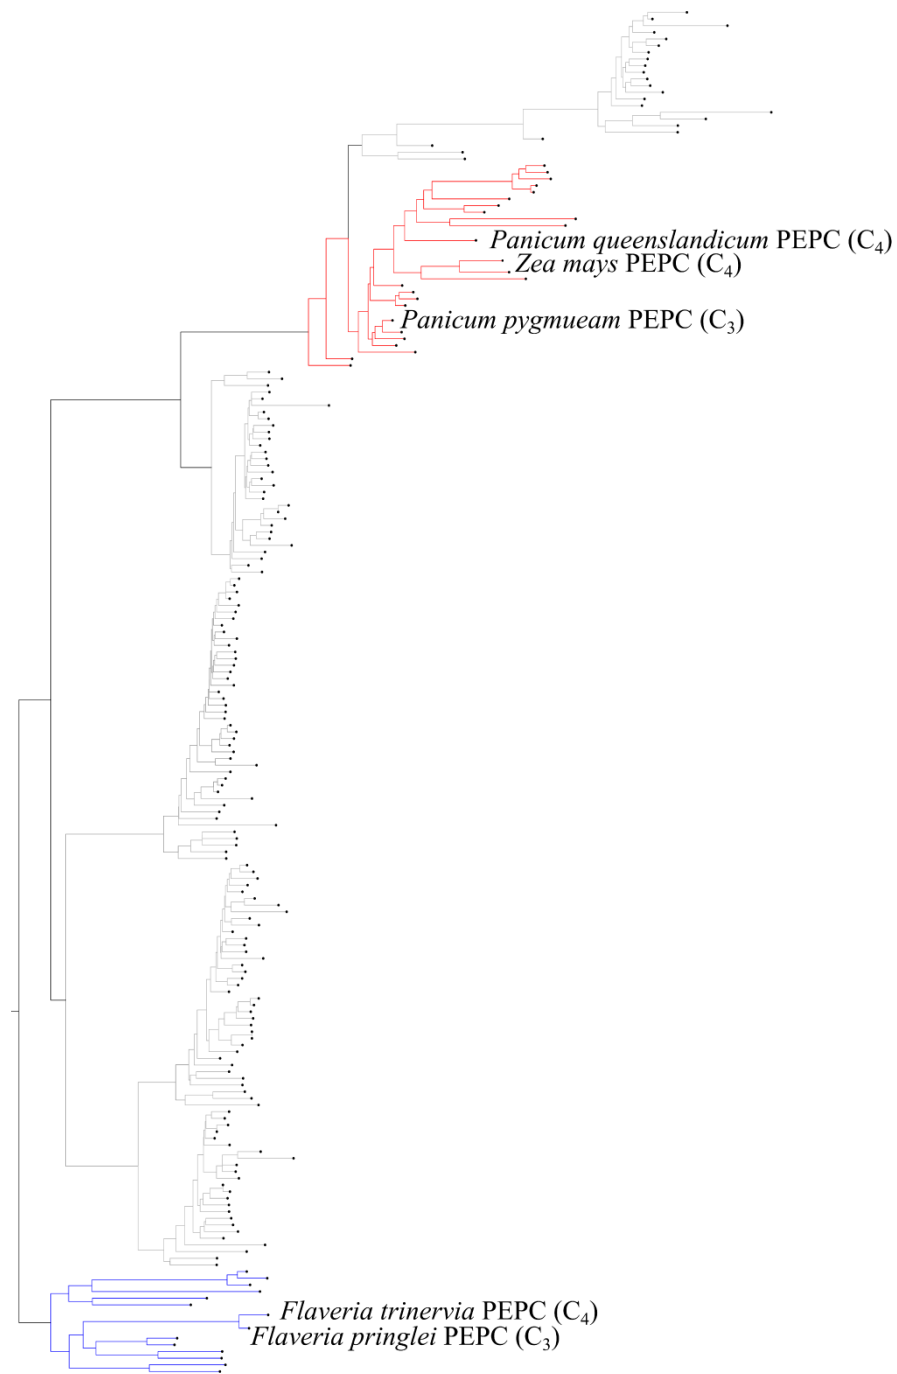

**Supplementary Figure 1. Maximum likelihood tree of orthologous PEPC genes.** In red are the ppc1P3 isoforms. In blue are the ppc1E2 isoforms. Sequences for *Zea mays* (C<sub>4</sub>) taken from (Dong et al., 1998).

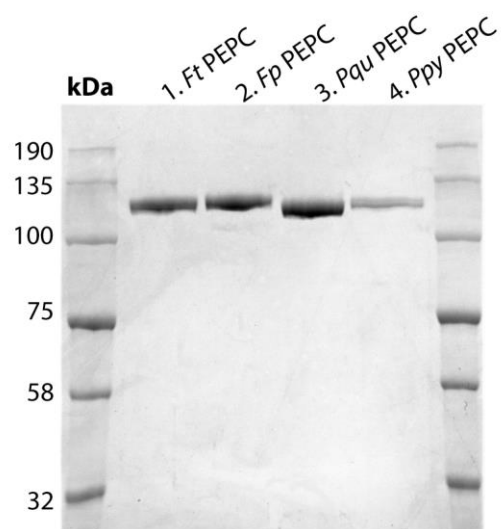

**Supplementary Figure 2. SDS PAGE gel of purified PEPC Enzymes.** 8 % acrylamide SDS PAGE analysis of PEPC proteins (5  $\mu$ g by BCA assay) compared in this study. Gel visualised with instant blue. PEPC from 1. *Flaveria trinervia*, 2. *Flaveria pringlei*, 3. *Panicum queenslandicum* and 4. *Panicum pygmaeum* PEPC.

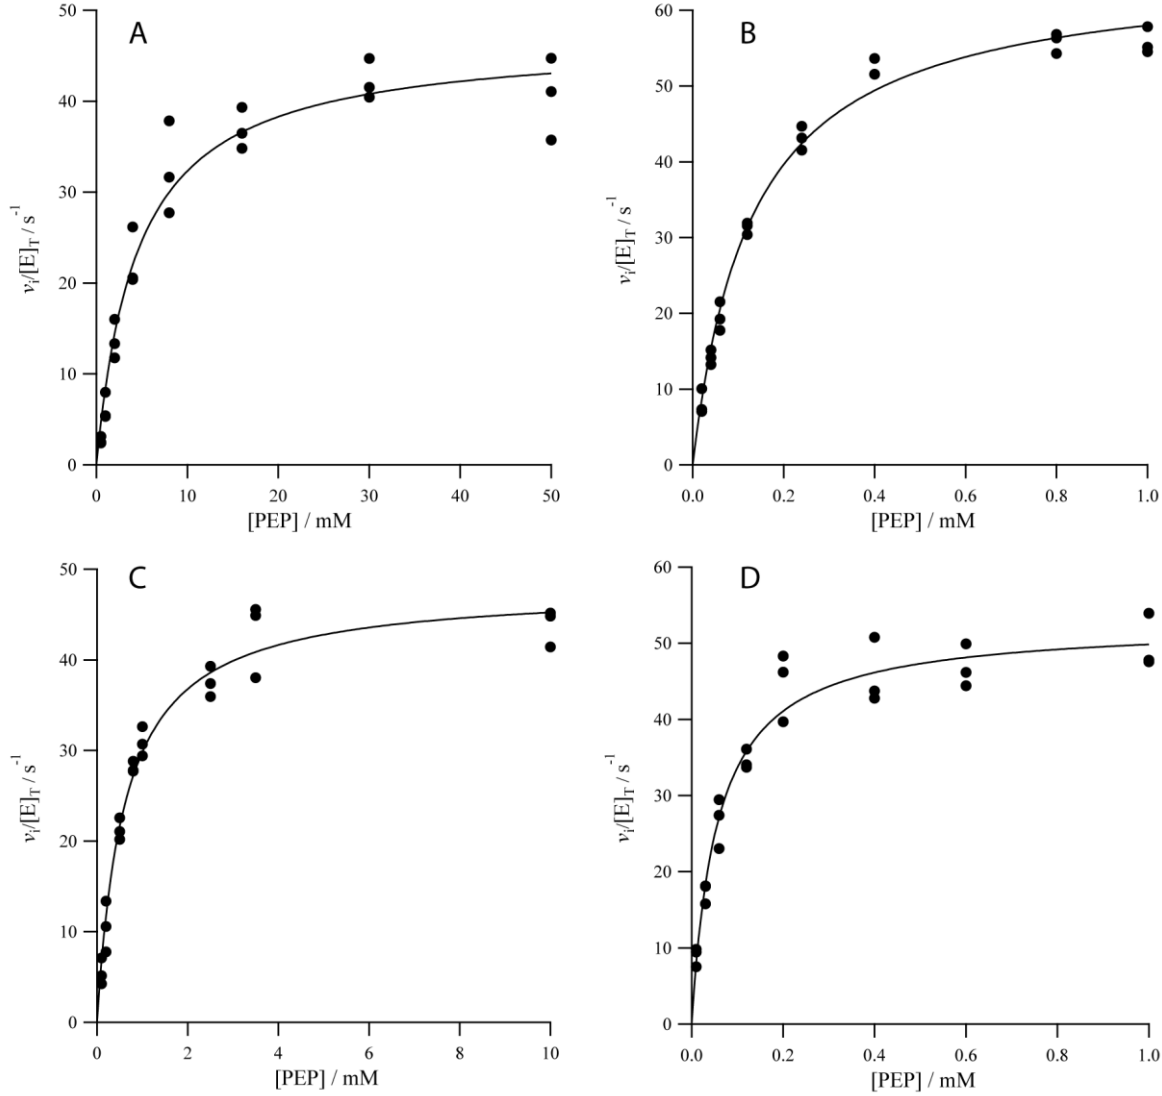

**Supplementary Figure 3. PEP Michaelis-Menten Assays ( $v_i$  vs PEP).** Assays conditions were 50 mM Tricine.KOH pH 8.0, 10 mM  $\text{MgCl}_2$ , 0.2 mM NADH, 0.01  $\text{U}\mu\text{l}^{-1}$  malate dehydrogenase, initiated by 10 nM PEPC. Assays were repeated ( $n = 3$ ) for each concentration of PEP. Lines are described by equation 1. (A) Markers experimental data for *Panicum queenslandicum* PEPC, the line is characterised by the parameters  $k_{\text{cat}} = 46.96 \pm 1.74 \text{ s}^{-1}$ ,  $K_{\text{m}}^{\text{PEP}} = 4.53 \pm 0.59 \text{ mM}$  and  $k_{\text{cat}}/K_{\text{m}}^{\text{PEP}} = 0.10 \times 10^5 \pm 1.08 \times 10^3 \text{ M}^{-1}\text{s}^{-1}$ ; (B) Markers represent data for *Panicum pygmaeum* PEPC, the line is characterised by the parameters  $k_{\text{cat}} = 65.59 \pm 1.26 \text{ s}^{-1}$ ,  $K_{\text{m}}^{\text{PEP}} = 0.13 \pm 0.01 \text{ mM}$  and  $k_{\text{cat}}/K_{\text{m}}^{\text{PEP}} = 5.01 \times 10^5 \pm 2.44 \times 10^4 \text{ M}^{-1}\text{s}^{-1}$ ; (C) Markers represent experimental data for *Flaveria trinervia* PEPC, the line is characterised by the parameters  $k_{\text{cat}} = 47.99 \pm 1.21 \text{ s}^{-1}$ ,  $K_{\text{m}}^{\text{PEP}} = 0.60 \pm 0.05 \text{ mM}$ , and  $k_{\text{cat}}/K_{\text{m}}^{\text{PEP}} = 0.79 \times 10^5 \pm 5.43 \times 10^3 \text{ M}^{-1}\text{s}^{-1}$ ; (D) Markers represent experimental data for *Flaveria pringlei* PEPC, the line is characterised by the parameters  $k_{\text{cat}} = 52.65 \pm 1.37 \text{ s}^{-1}$ ,  $K_{\text{m}}^{\text{PEP}} = 0.06 \pm 0.01 \text{ mM}$  and  $k_{\text{cat}}/K_{\text{m}}^{\text{PEP}} = 9.35 \times 10^5 \pm 8.49 \times 10^4 \text{ M}^{-1}\text{s}^{-1}$ .

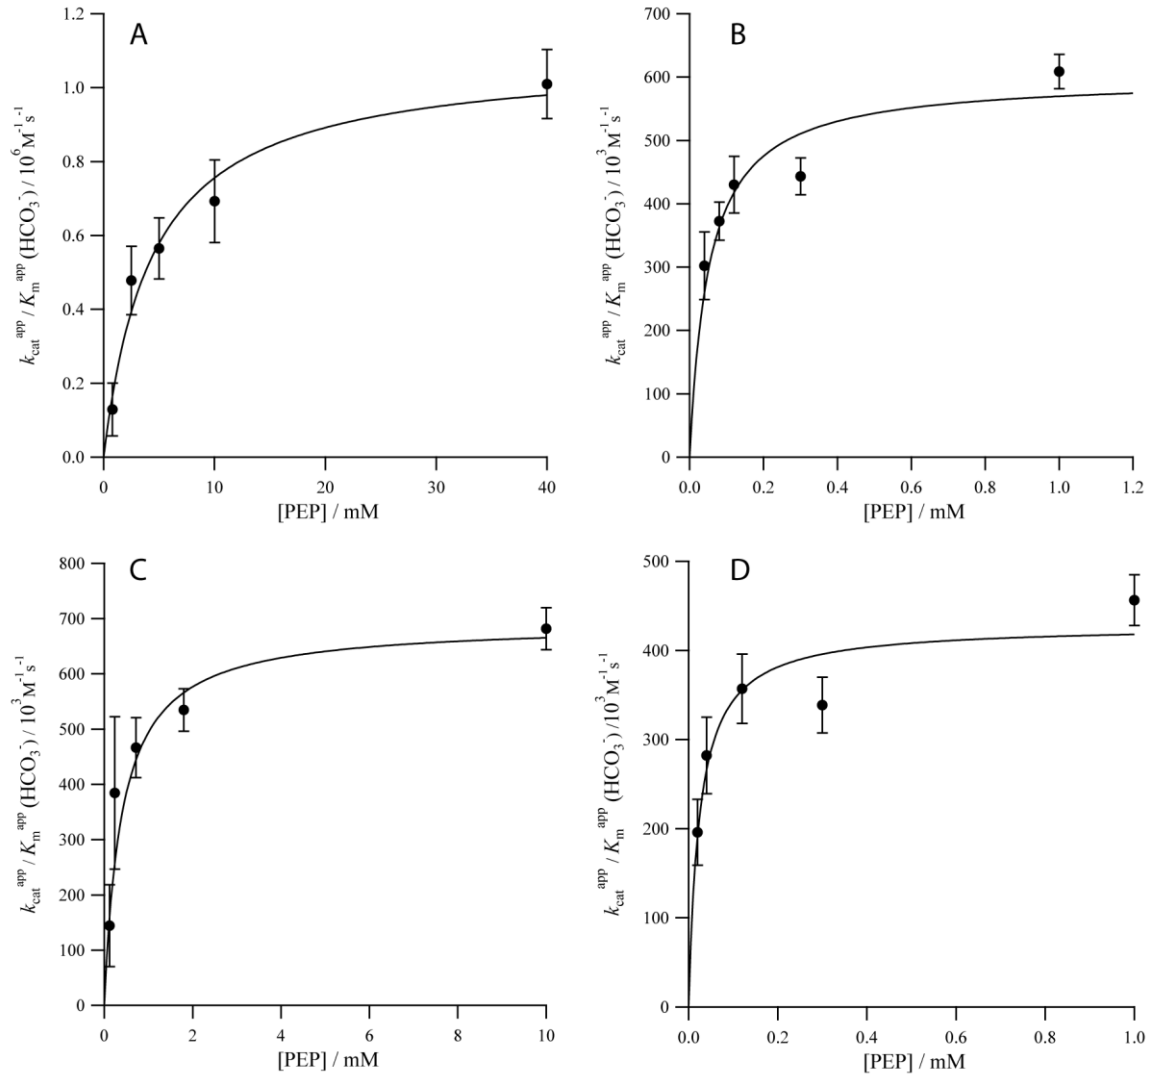

**Supplementary Figure 4. Secondary analysis of bicarbonate Michaelis-Menten behaviour ( $k_{\text{cat}}^{\text{app}}/K_{\text{m}}^{\text{app}}$  vs PEP).** Secondary plot of the  $k_{\text{cat}}^{\text{app}}/K_{\text{m}}^{\text{app}}$   $\text{HCO}_3^-$  parameter from fitting data shown in Figure 1, the lines are described by equation 2 and error bars represent standard errors. Markers represent the  $k_{\text{cat}}^{\text{app}}/K_{\text{m}}^{\text{app}}$   $\text{HCO}_3^-$  for PEPC from (A) *Panicum queenslandicum*, the line is characterised by the parameters  $K_i^{\text{PEP}} = 4.39 \pm 1.10$  mM and  $k_{\text{cat}}/K_{\text{m}}^{\text{HCO}_3^-} = 1.09 \times 10^6 \pm 8.88 \times 10^4 \text{ M}^{-1}\text{s}^{-1}$ ; (B) *Panicum pygmaeum*, the line is characterised by the parameters  $K_i^{\text{PEP}} = 0.02 \pm 0.01$  mM and  $k_{\text{cat}}/K_{\text{m}}^{\text{HCO}_3^-} = 0.60 \times 10^6 \pm 2.93 \times 10^4 \text{ M}^{-1}\text{s}^{-1}$ ; (C) *Flaveria trinervia*, the line is characterised by the parameters  $K_i^{\text{PEP}} = 0.40 \pm 0.13$  mM and  $k_{\text{cat}}/K_{\text{m}}^{\text{HCO}_3^-} = 0.69 \times 10^6 \pm 4.17 \times 10^4 \text{ M}^{-1}\text{s}^{-1}$ . (D) *Flaveria pringlei*, the line is characterised by the parameters  $K_i^{\text{PEP}} = 0.02 \pm 0.01$  mM and  $k_{\text{cat}}/K_{\text{m}}^{\text{HCO}_3^-} = 0.44 \times 10^6 \pm 2.17 \times 10^4 \text{ M}^{-1}\text{s}^{-1}$ .

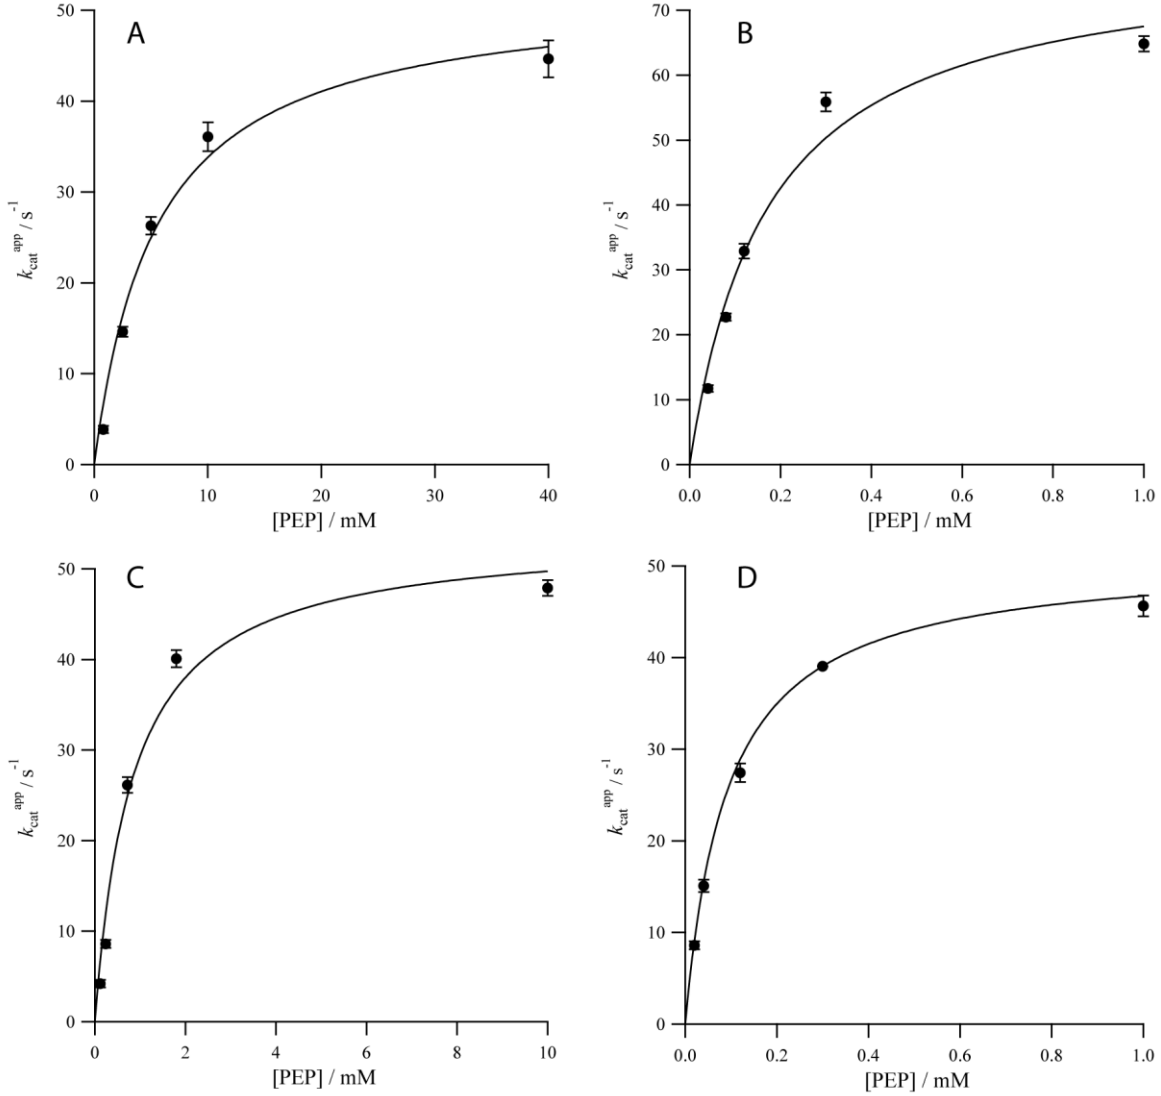

**Supplementary Figure 5. Secondary analysis of bicarbonate Michaelis-Menten behaviour**

**( $k_{\text{cat}}^{\text{app}}$  vs PEP).** Secondary plot of the  $k_{\text{cat}}^{\text{app}}$  parameter from fitting data shown in Figure 1. The line described by equation 2, error bars represent standard errors from fit of lines. Markers represent the  $k_{\text{cat}}^{\text{app}}$  parameter for PEPC from (A) *Panicum queenslandicum*, the line is characterised by the parameters  $k_{\text{cat}} = 52.25 \pm 3.72 \text{ s}^{-1}$   $K_{\text{m}}^{\text{PEP}} = 5.46 \pm 1.12 \text{ mM}$ ; (B) *Panicum pygmaeum*, the line is characterised by the parameters  $k_{\text{cat}} = 79.06 \pm 6.64 \text{ s}^{-1}$  and  $K_{\text{m}}^{\text{PEP}} = 0.17 \pm 0.04 \text{ mM}$ ; (C) *Flaveria trinervia*, the line is characterised by the parameters  $k_{\text{cat}} = 53.89 \pm 4.12 \text{ s}^{-1}$  and  $K_{\text{m}}^{\text{PEP}} = 0.84 \pm 0.02 \text{ mM}$ ; (D) *Flaveria pringlei*, the line is characterised by the parameters  $k_{\text{cat}} = 51.01 \pm 0.05 \text{ s}^{-1}$ ,  $K_{\text{m}}^{\text{PEP}} = 0.08 \pm 0.01 \text{ mM}$ .

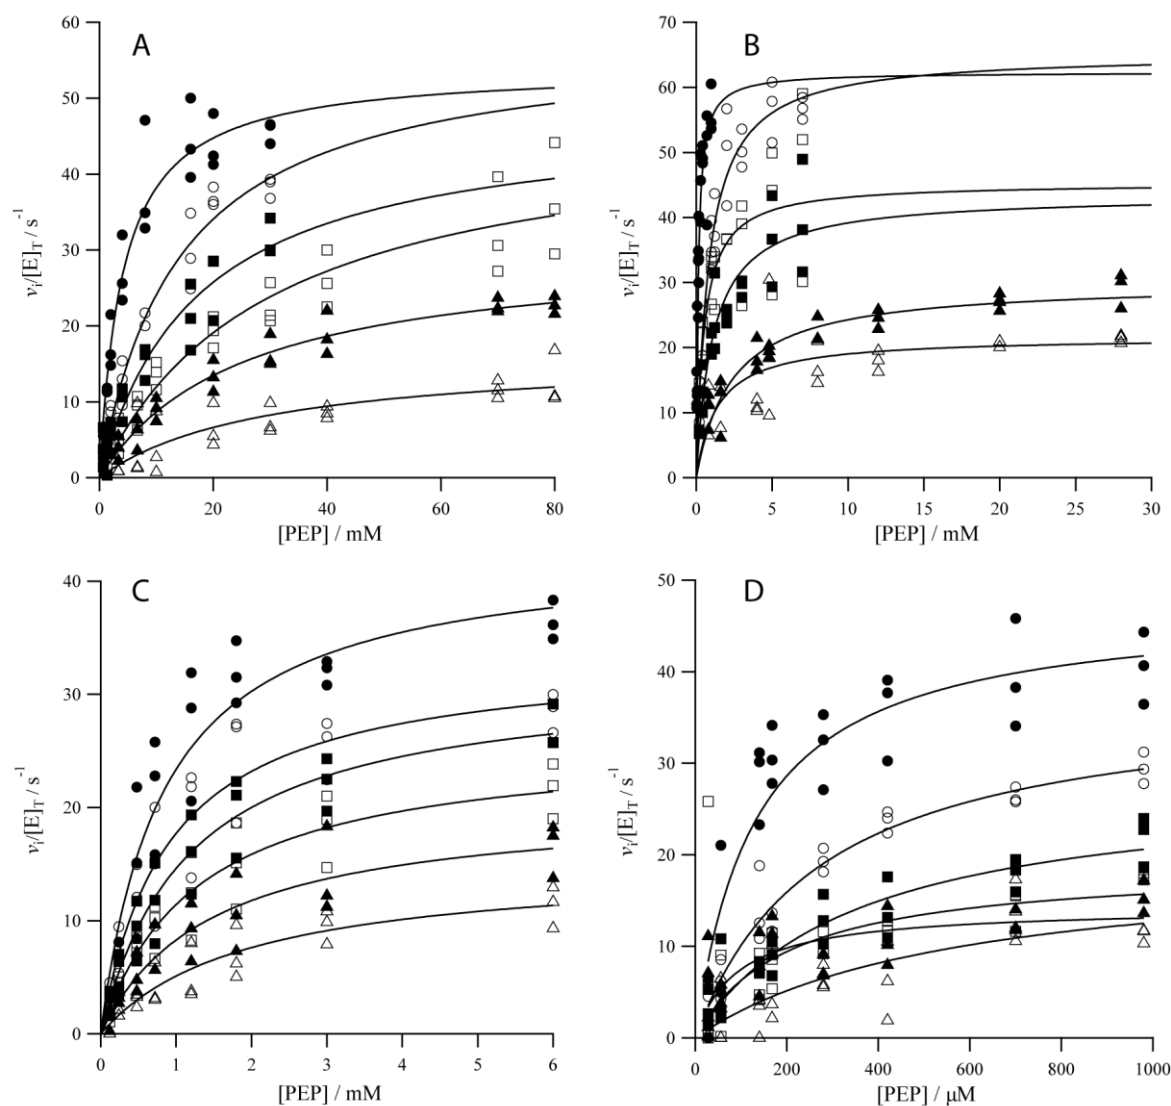

**Supplementary Figure 6. Primary plots of Malate Inhibition Assays ( $v_i$  vs PEP).** Assays conditions were 50 mM Tricine.KOH pH 8.0, 10 mM  $MgCl_2$ , 0.2 mM NADH, 0.01  $U\mu l^{-1}$  malate dehydrogenase, PEP concentration as shown on the axis. Lines are described by equation one. Assays were repeated ( $n = 3$ ) for each point. Markers (in order of increasing malate: ●, ○, ■, □, ▲, △) show individual data points for the following PEPC with enzyme concentration in brackets (A) *P. queenslandicum* (10 nM), with 0, 8 mM, 16 mM, 32 mM, 60 mM and 120 mM malate; (B) *P. pygmaeum* (5 nM), with 0, 4 mM, 12 mM, 24 mM, 32 mM and 60 mM malate; (C) *F. trinervia* (10 nM), with 0, 8 mM, 16 mM, 32 mM, 60 mM and 120 mM malate; (D) *F. pringlei* (5 nM), with 0, 4 mM, 12 mM, 24 mM, 32 mM and 60 mM malate.

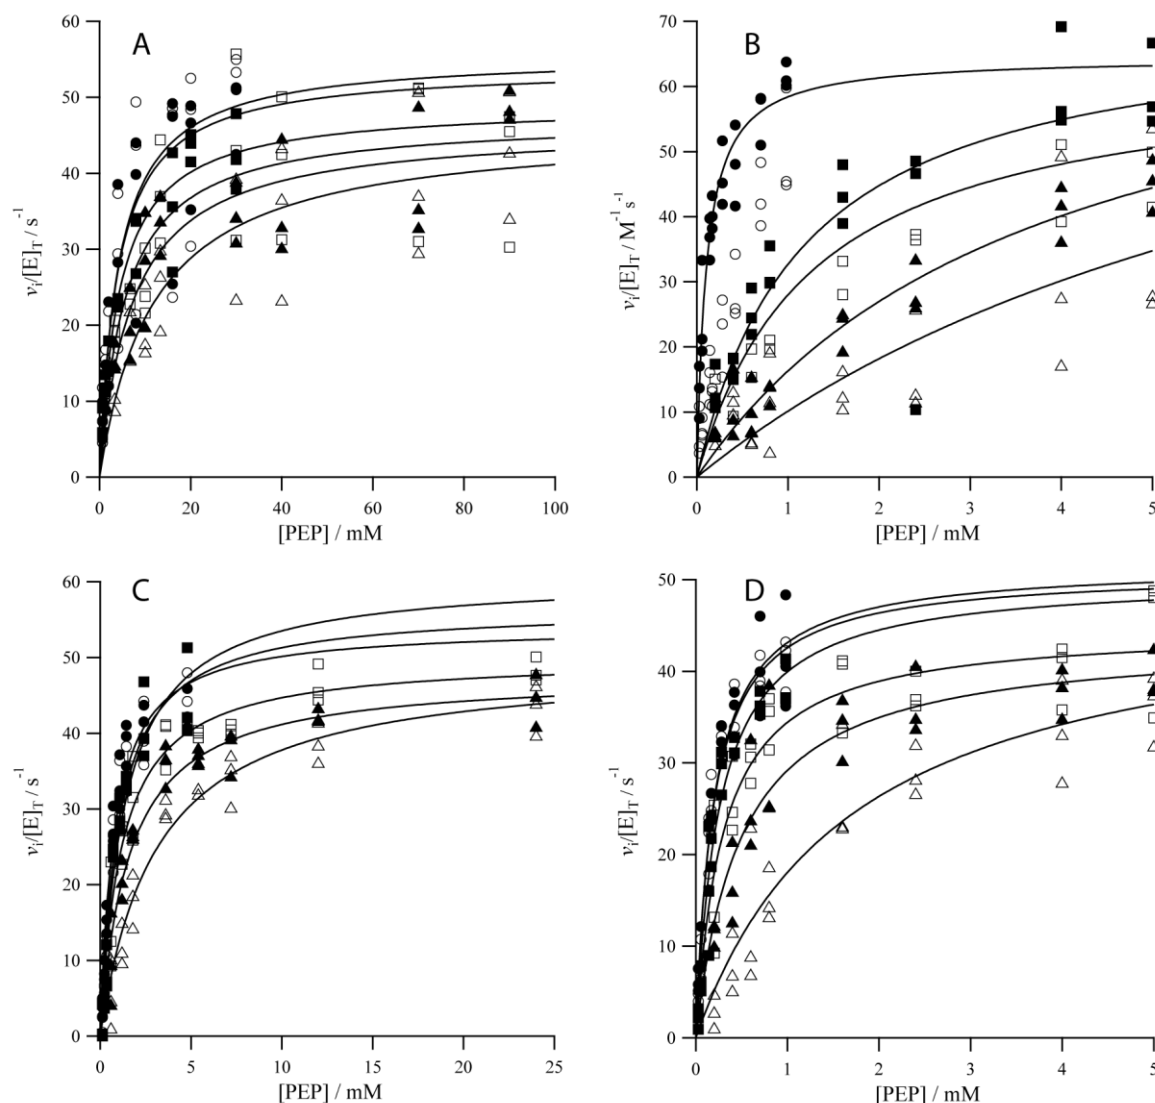

**Supplementary Figure 7. Primary plots of Michaelis-Menten Aspartate Inhibition Assays ( $v_i$  vs PEP).** Assays conditions were 50 mM Tricine.KOH pH 8.0, 10 mM  $\text{MgCl}_2$ , 0.2 mM NADH, 0.01  $\text{U}\mu\text{l}^{-1}$  malate dehydrogenase, PEP concentration as shown. Lines are described by equation one. Assays were repeated ( $n = 3$ ) for each point. Markers (in order of increasing aspartate: ●, ○, ■, □, ▲, △) show individual data points for the following PEPC with enzyme concentration in brackets (A) *P. queenslandicum* (10 nM) with 0, 8 mM, 16 mM, 32 mM, 60 mM and 120 mM aspartate, 60 mM and 120 mM aspartate; (B) *P. pygmaeum* (5 nM) with 0, 8 mM, 16 mM, 32 mM; (C) *F. trinervia* (10 nM) with 0, 8 mM, 16 mM, 32 mM, 60 mM and 120 mM aspartate; (D) *P. pygmaeum* (5 nM) with 0, 8 mM, 16 mM, 32 mM; (D) *F. pringlei* (5 nM), performed in the presence of 0, 8 mM, 16 mM, 32 mM, 60 mM and 120 mM aspartate.

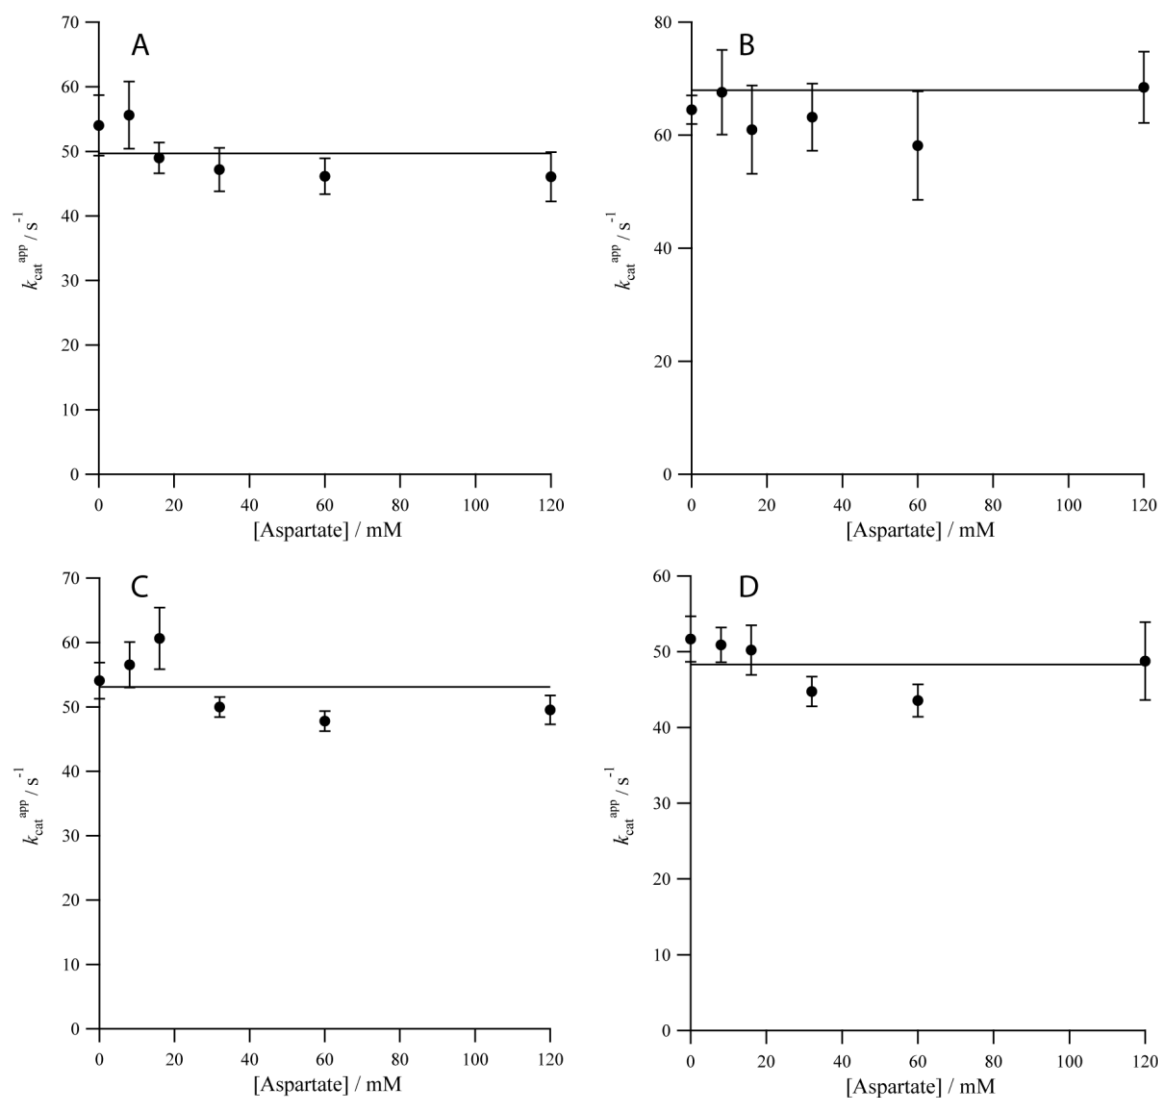

**Supplementary Figure 8. Secondary plots of Aspartate Inhibition ( $k_{cat}^{app}$  vs Aspartate).** Assays conditions were 50 mM Tricine.KOH pH 8.0, 10 mM  $MgCl_2$ , 0.2 mM NADH, 0.01  $U\mu l^{-1}$  malate dehydrogenase, in the presence of varied aspartate (0-120 mM). Lines are illustrative and error bars represent standard errors. Secondary plot of  $k_{cat}^{app}$  against aspartate concentration for PEPC from (A) *P. queenslandicum*, (B) *P. pygmaeum*, (C) *F. trinervia*, and (D) *F. pringlei*.

**Supplementary Table 1 Summary of primers used in this study.** Primers were used for cloning and sequencing.

| <b>Primer</b>     | <b>Sequence</b>                        |
|-------------------|----------------------------------------|
| FlvFor1B          | TACTTCCAATCCAATGCAATGGCTAACCGGAAT      |
| FlvRev1B          | TTATCCACTTCCAATGTTATTACTAACCGGTGTTCTGC |
| Flav_1303_Seq_For | AGACAAGTGTCGACTT                       |
| Flav_1832_Seq_Rev | TTGTAGAGCTGCCATG                       |
| PquFor1B          | GACGACGACAAGATGGCGTCCTCCGAGCGCCACC     |
| PquRev1B          | GAGGAGAAGCCCGGTTAGCCCGTGTTCTGCATGCC    |
| PpyFor1B          | TACTTCCAATCCAATGCAATGGCAAGCAG          |
| PpyRev1B          | TTATCCACTTCCAATGTTATTATTAACCGGTATTC    |
| Pqu_1323_Seq_For  | CGTGAAGCTGGACAT                        |
| Pqu_1752_Seq_Rev  | ATGACCTGCTGCTTG                        |
| Ppy_1291_Seq_For  | GATGGTAGTCTGCTGG                       |
| Ppy_1791_Seq_Rev  | GCTATCGCTATAACCA                       |
| T7 Promotor       | TAATACGACTCACTATAGGG                   |
| T7 Terminator     | GCTAGTTATTGCTCAGCGG                    |
